# Supplementary material for: Liquid–Liquid Phase Separation Modifies the Dynamic Properties of Intrinsically Disordered Proteins
Source: PubMed Central journal article supplement — J Am Chem Soc. 2023 May 5;145(19):10548–63. doi: 10.1021/jacs.2c13647 (PMC10197138; doi:10.1021/jacs.2c13647), 2023-05-05
Supplement: ja2c13647_si_001.pdf [file ja2c13647_si_001.pdf]

## Supporting Information

### **Liquid-liquid phase separation modifies the dynamic properties of intrinsically disordered proteins**

Serafima Guseva<sup>†</sup>, Vincent Schnapka<sup>†</sup>, Wiktor Adamski, Damien Maurin, R.W.H. Ruigrok, Nicola Salvi, Martin Blackledge\*

Institut de Biologie Structurale,  
Université Grenoble Alpes-CEA-CNRS  
71, Avenue des Martyrs  
Grenoble  
France

**Figure S1**

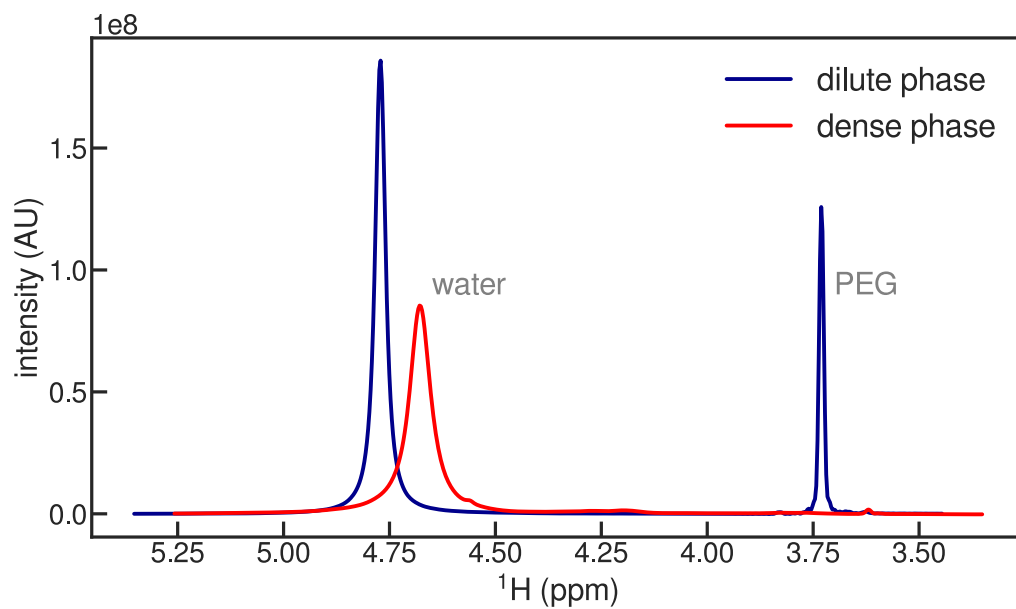

**PEG is predominantly localised in the dilute phase of phase-separated  $N_{\text{TAIL}}$ -PEG mixtures**

$^1\text{H}$  NMR spectra of (a) dense phase, and (b) the coexisting dilute, indicating that PEG is predominantly localised to the dilute phase.

Figure S2

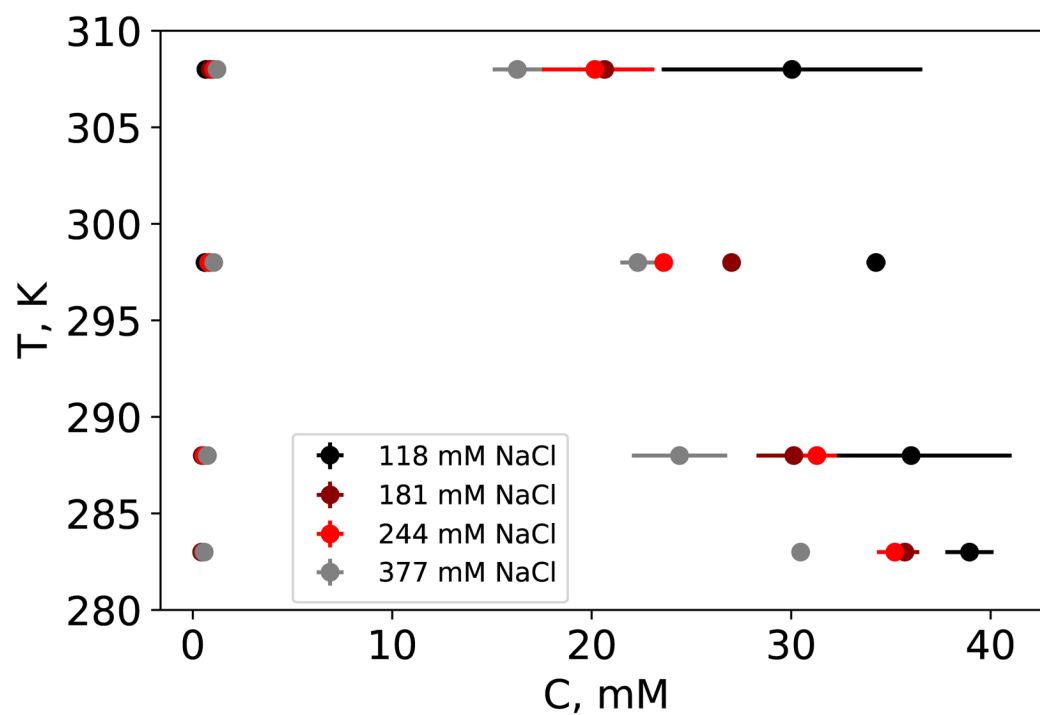

$N_{TAIL}$  phase diagram (molar concentration  $C$ ) as a dependency on temperature. Different colours correspond to different salt concentrations (black -118, dark red - 181, red - 244 and grey - 377 mM NaCl).

**Figure S3A**

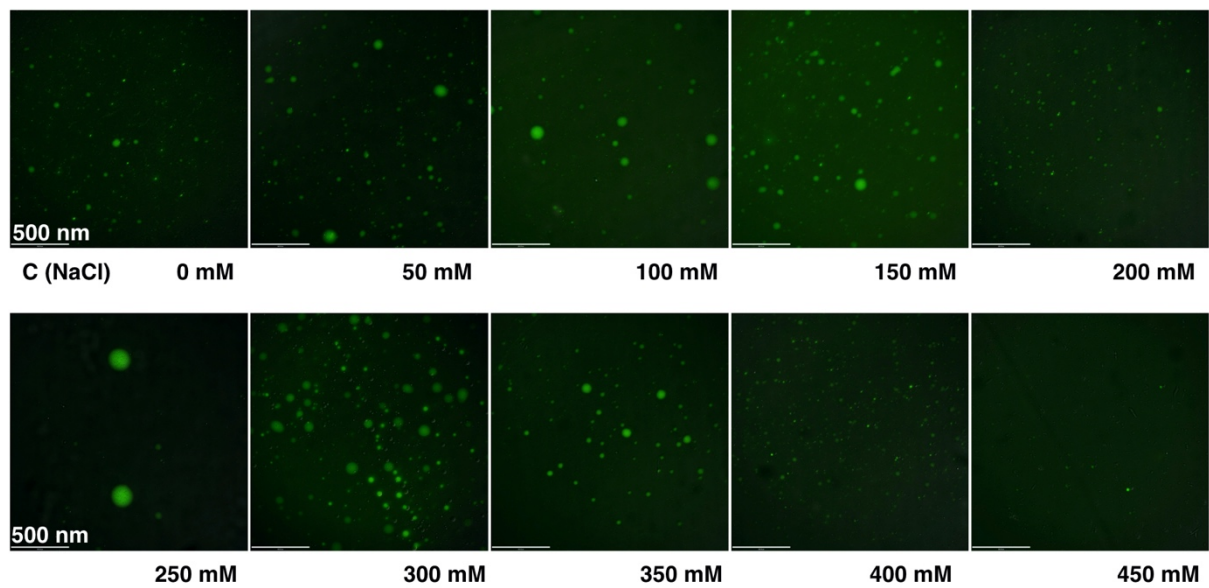

Fluorescent microscopy images of  $N_{TAIL}$  droplets taken at different NaCl concentrations.

**Figure S3B**

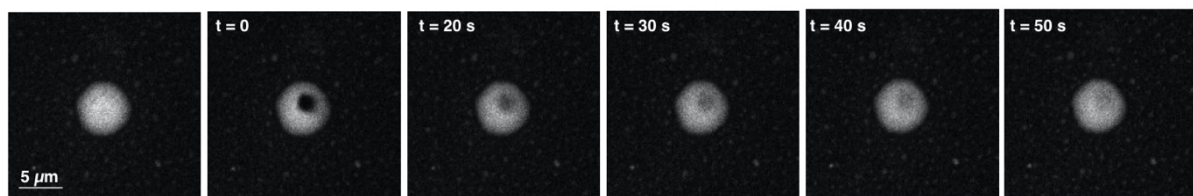

Example of Fluorescence recovery after photobleaching (FRAP) carried out on a single  $N_{TAIL}$  droplet (see Methods).

Figure S4

S4A

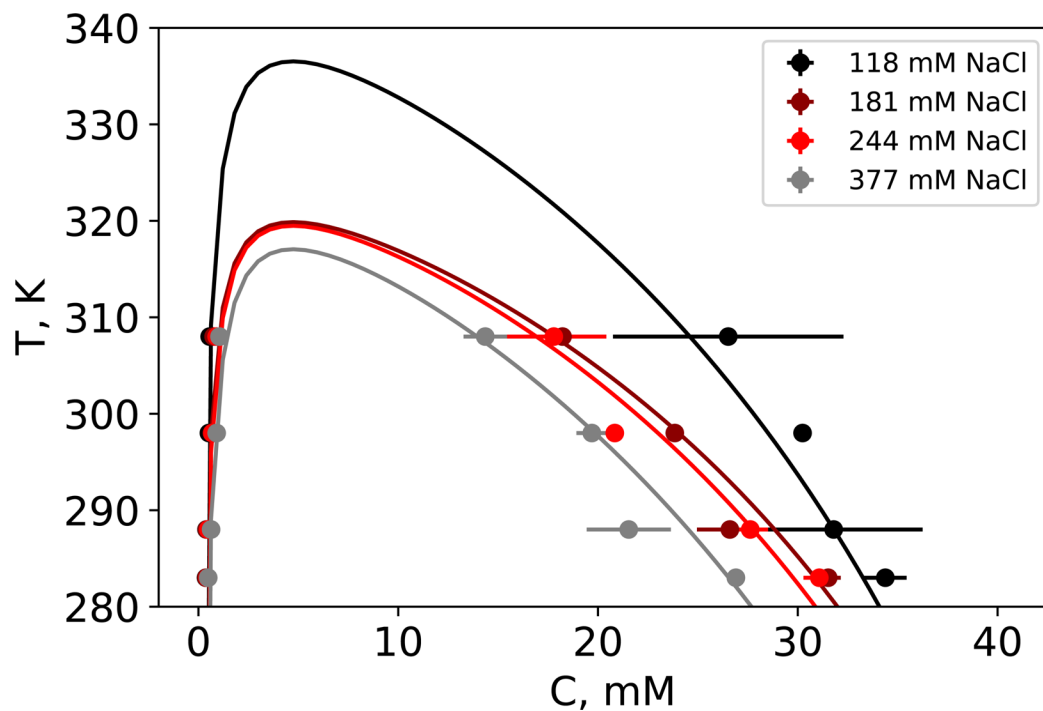

S4B

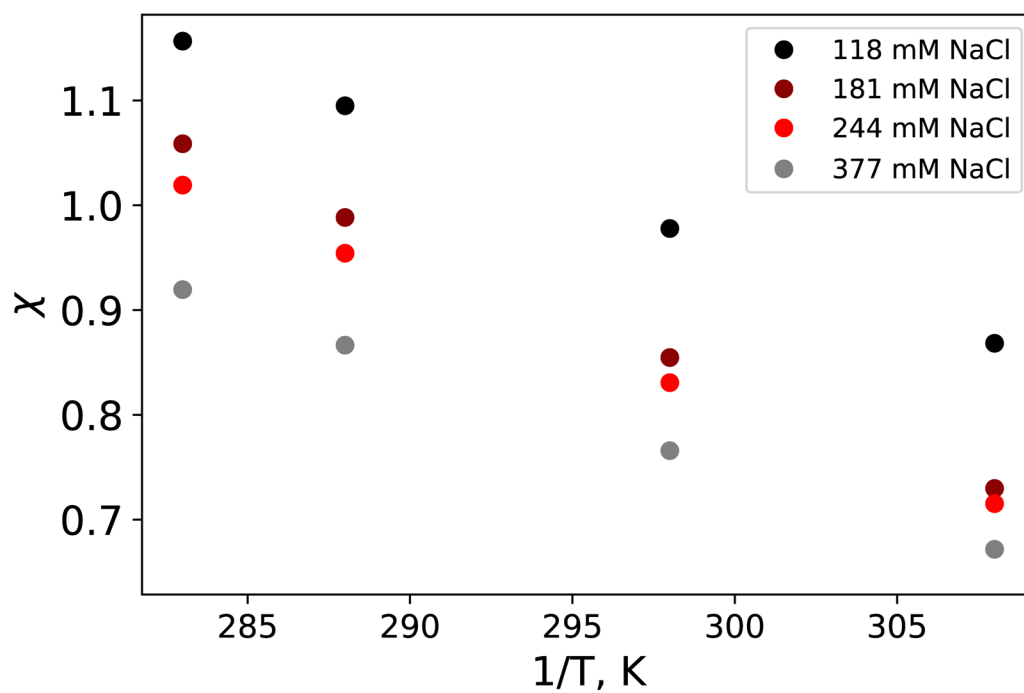

**Flory-Huggins model fit of the experimentally determined phase diagram**

S4A - Phase diagram calculated from fitting to equation 1.

S4B - Calculated  $\chi$  parameter for all temperature and salt conditions.

Figure S5

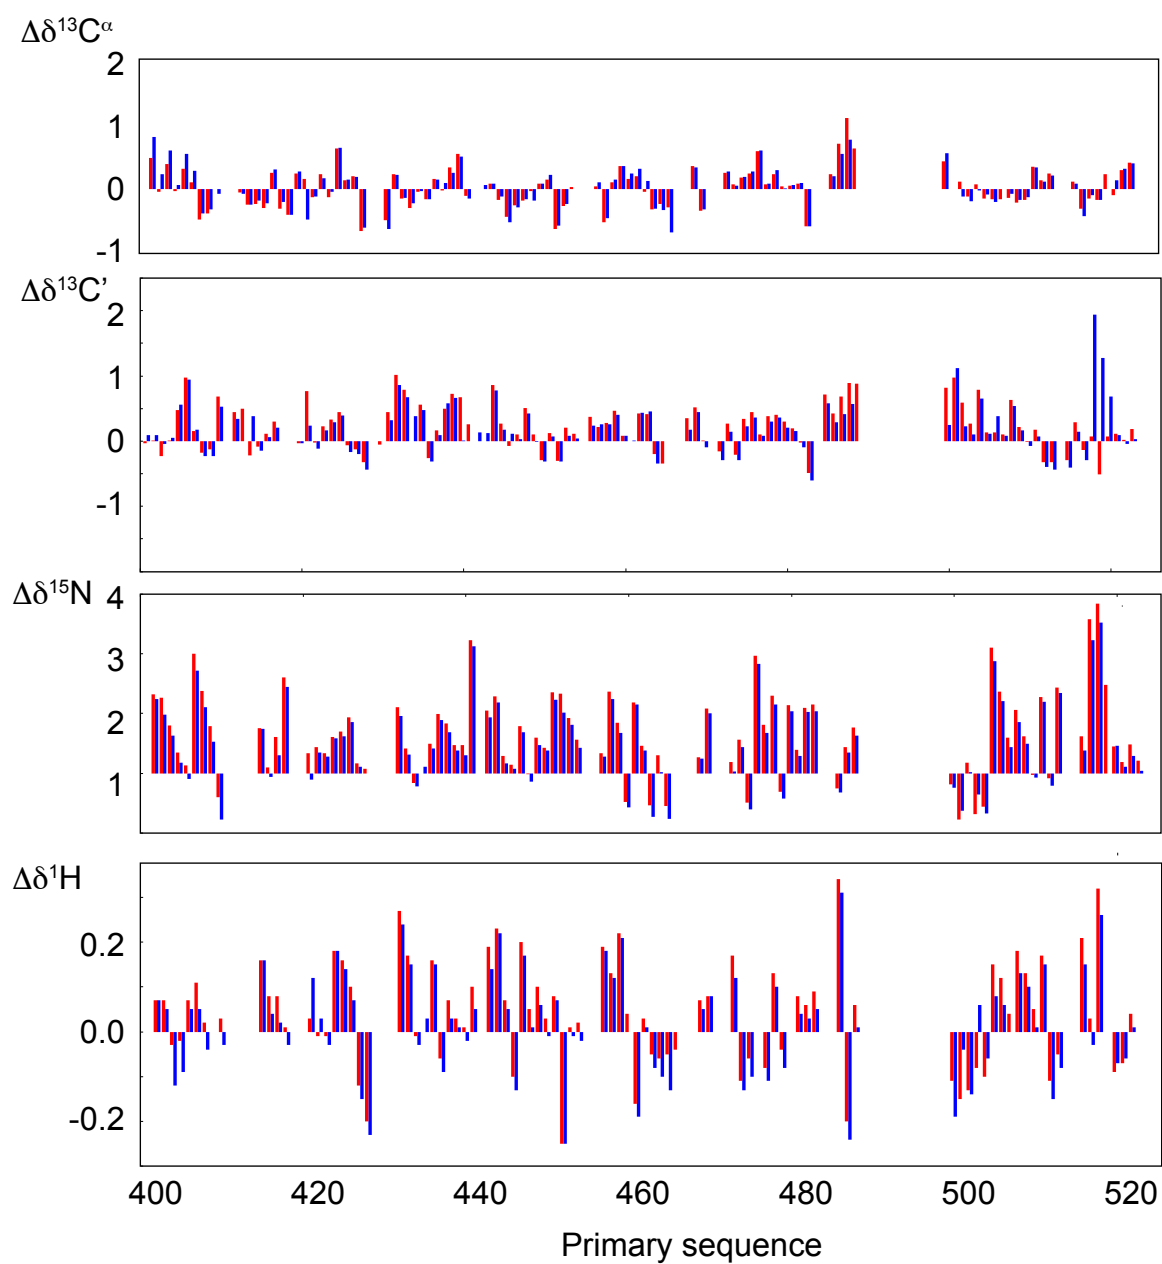

**Secondary chemical shifts of  $N_{\text{TAIL}}$  suggest conserved backbone conformational sampling throughout phase space.**

Top to bottom:  $^{13}\text{C}_\alpha$ ,  $^{13}\text{C}'$ ,  $^{15}\text{N}$  and  $^1\text{H}$  secondary chemical shifts.

Red -  $N_{\text{TAIL}}$  in the dilute state, blue -  $N_{\text{TAIL}}$  in the dense phase.

**Figure S6**

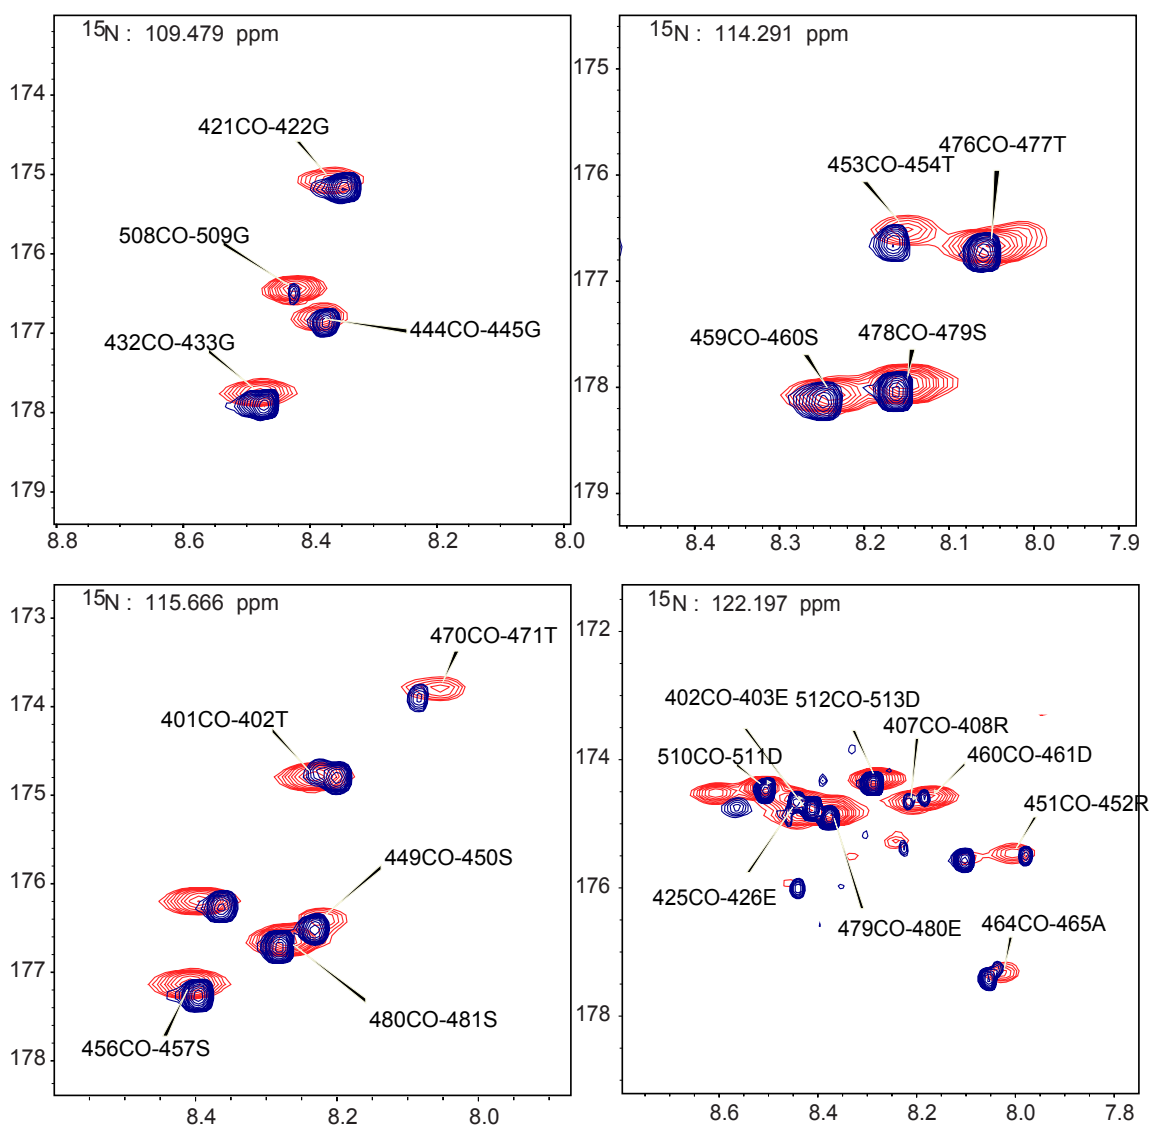

**Backbone chemical shifts of  $\text{N}_{\text{TAIL}}$  suggest conserved backbone conformational sampling throughout phase space.**

Comparison of  $^{15}\text{N}$  planes from triple resonance HNCO experiments on dilute (blue) and dense (red) phase samples showing similarity of  $^{\text{N}}\text{H-C}'$  correlations under the two conditions.

**Figure S7**

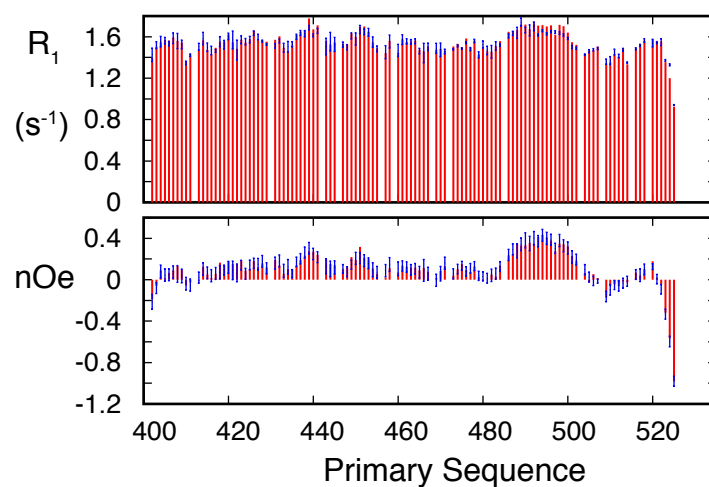

**Cross-validation of dynamic model of  $N_{TAIL}$  in the dilute phase**

Experimental  $R_1$  and heteronuclear  $^1H$ - $^{15}N$  nOe measured at 700MHz on the 0g/L (PEG concentration)  $N_{TAIL}$  sample in the dilute phase (blue), compared to values back-calculated from the dynamic model-free analysis (red bars) of data measured at 600 and 850 MHz at 0, 37.5 and 75g/L PEG10000). Rmsd values are within the mean experimental error for both  $R_1$  (0.033 compared to 0.0319) and heteronuclear  $^1H$ - $^{15}N$  nOe (0.035 compared to 0.042).



Figure S8

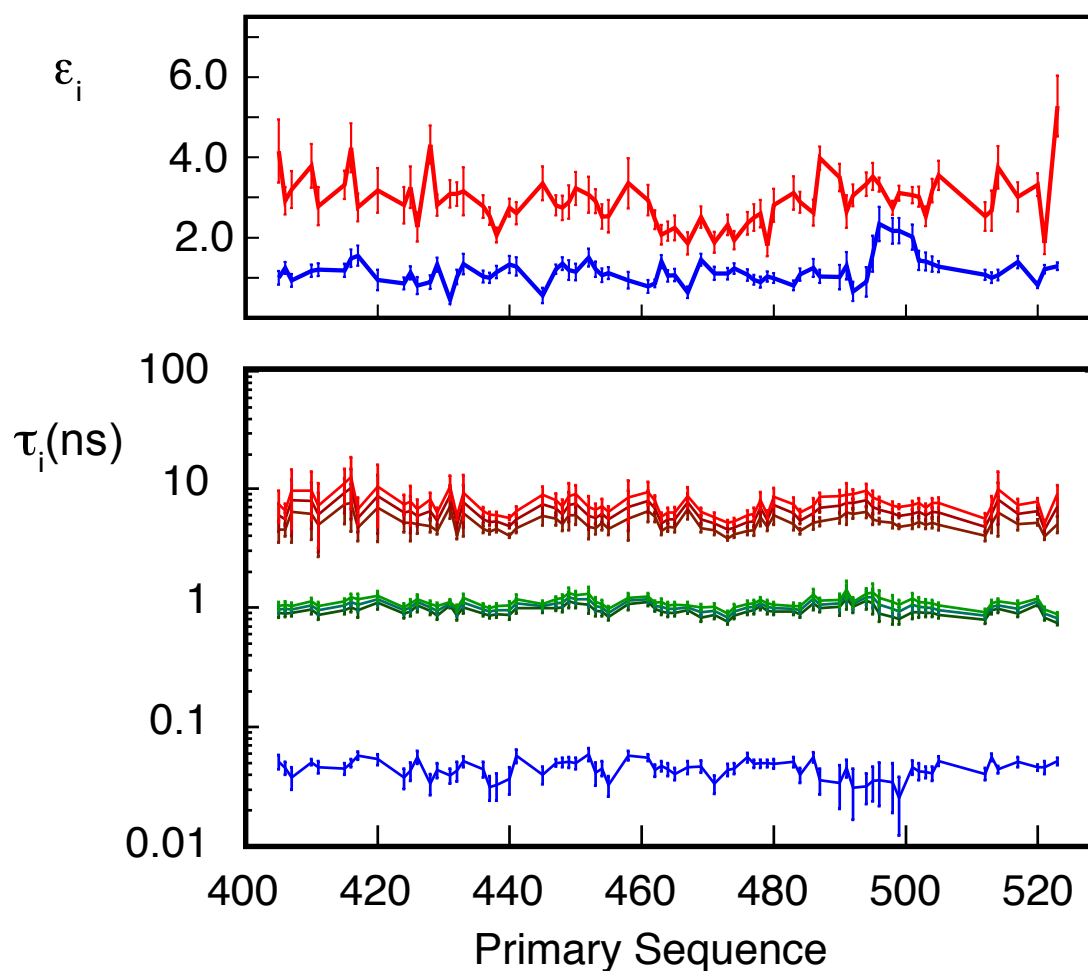

**Model-free analysis of dynamic behaviour of  $N_{TAIL}$  as a function of viscosity**

Top – Residue-specific viscosity coefficients for the intermediate (blue) and slow (red) dynamics modes.

Bottom – Residue-specific correlation times of segmental backbone motions ( $\tau_3$ )- 0 g/L (dark red), 37.5 g/L (red) and 75 g/L PEG10000 (light red), intermediate, backbone motions ( $\tau_2$ ) - 0 g/L (dark green), 37.5 g/L (green) and 75 g/L PEG10000 (light green) and fast motions ( $\tau_1$ ) (blue)

**Figure S9**

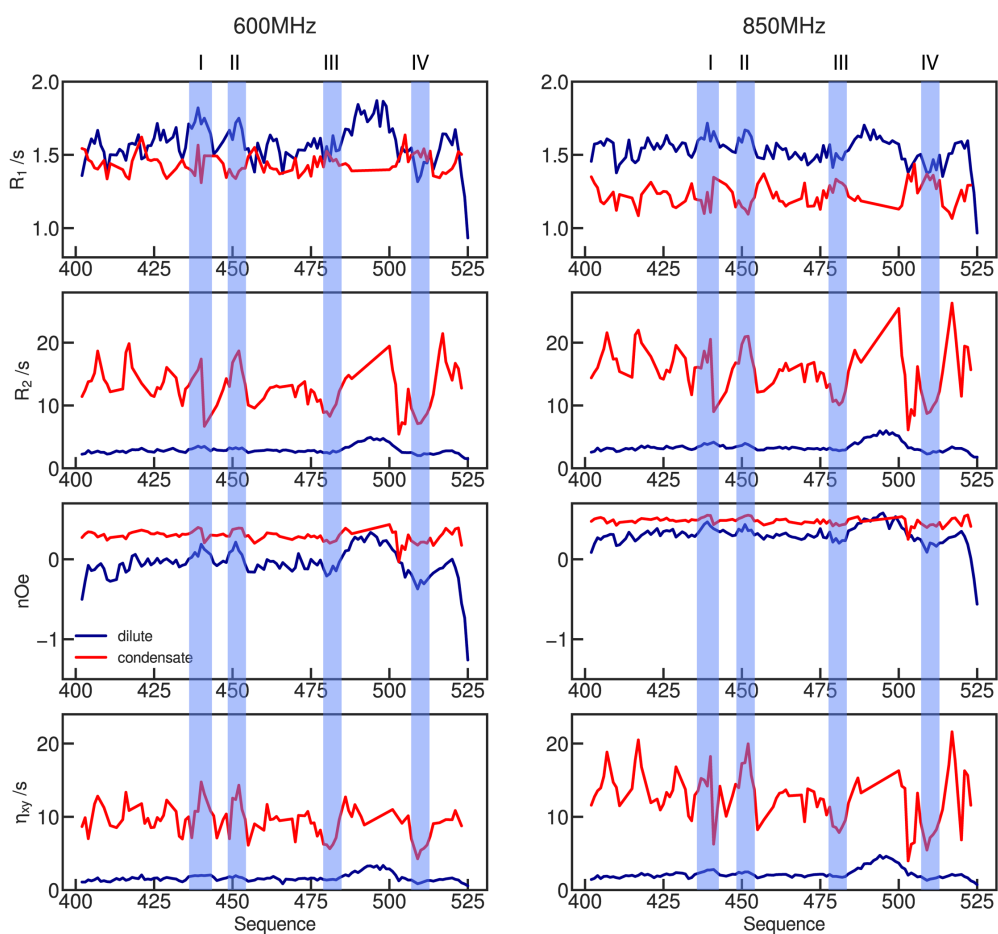

**Identification of regions of  $N_{TAIL}$  exhibiting specific dynamic behaviour**

Figure 4 of the manuscript is reproduced highlighting regions  $^{438}RRVK^{441}$  (I) and  $^{449}ESYRE^{453}$  (II), both exhibiting elevated transverse relaxation rates in both dilute and dense phases, and  $^{487}TASESS^{492}$  (III) and  $^{509}GSDT^{512}$  (IV) that clearly exhibit higher flexibility

**Figure S10**

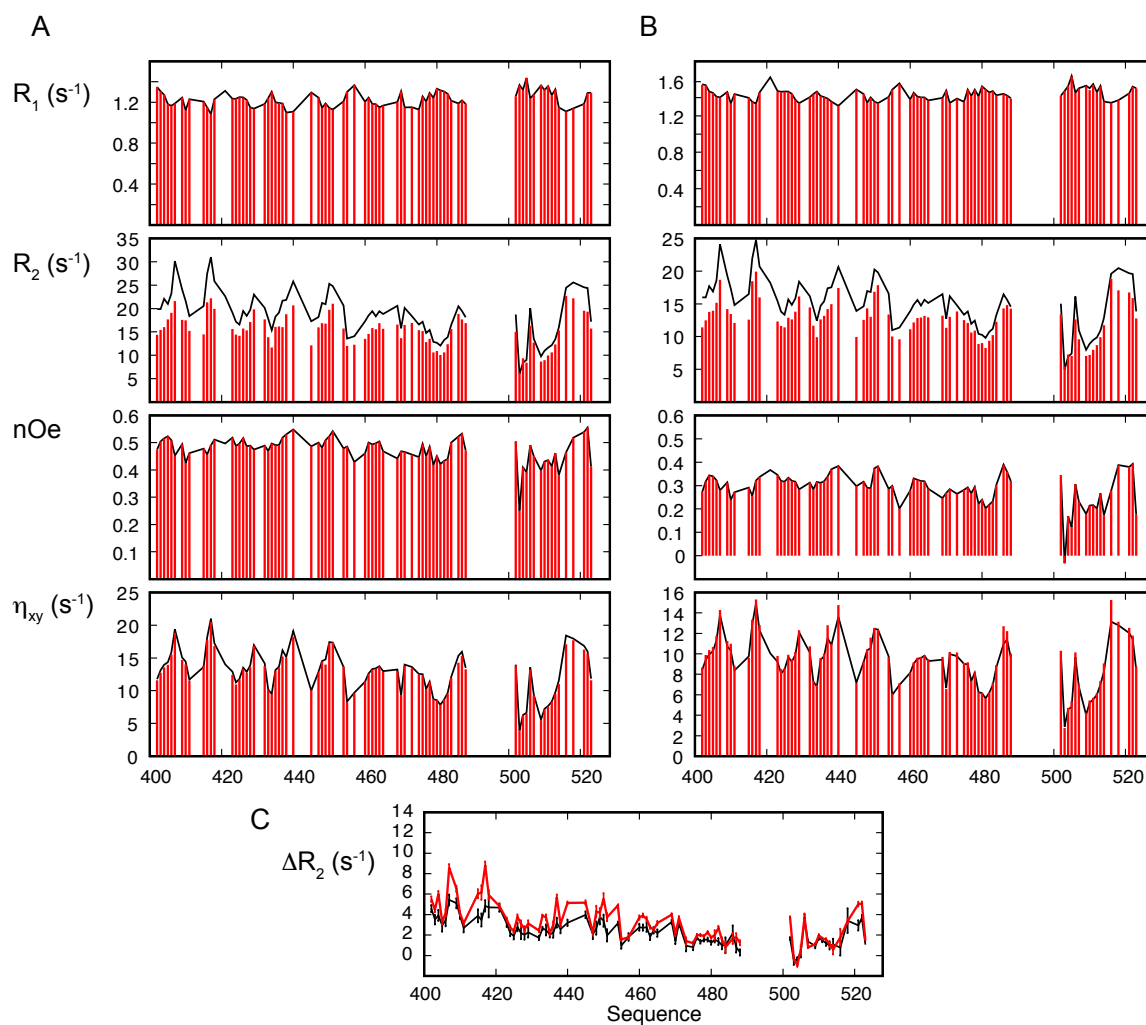

**Reproduction of experimental data by model-free analysis of data from the dense phase**  
88 experimental relaxation rates (black lines) were fitted to equation 7. 5 parameters were optimized ( $\tau_1, \tau_2, \tau_3, A_2$  and  $A_3$ ) by fitting to experimental (black)  $R_1$ ,  $\eta_{xy}$  and heteronuclear  $\{^1H\}$ - $^{15}N$   $nOe$  at two magnetic field strengths (A-850 and B-600 MHz). Calculated values are shown as red bars. C -  $R_2$  values were back-calculated from this model-free analysis, and compared to experimental values ( $\Delta R_2 = R_{2,calc} - R_{2,exp}$ ) (red 850MHz, black – 600 MHz).

**Figure S11**

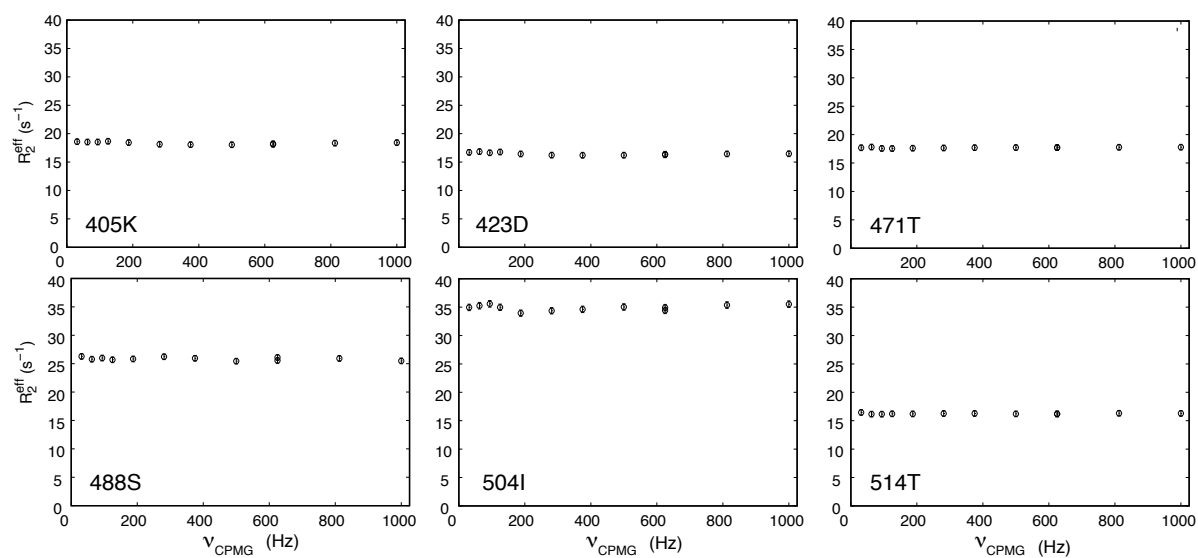

**Relaxation dispersion CPMG experiments carried on the  $N_{\text{TAIL}}$  in the dense phase**

Relaxation dispersion CPMG was carried out at 950 MHz in the dense phase, revealing no evidence for significant chemical shift exchange, as illustrated from 6 randomly selected amino acids along the primary sequence.

**Figure S12**

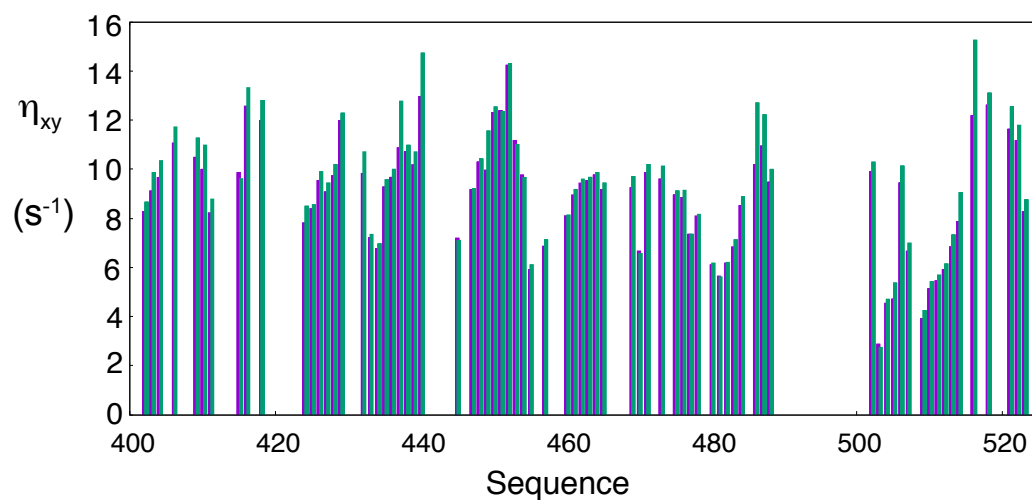

**Reproduction of experimental data by model-free analysis of data from the dense phase**

Experimental  $\eta_{xy}$  rates (blue bars) that were removed from the fit equation 7 and predicted from the fit of  $R_1$ , and heteronuclear  $\{^1\text{H}\}\text{-}^{15}\text{N}$  nOe at 600 MHz and  $R_1$ ,  $\eta_{xy}$  and heteronuclear  $\{^1\text{H}\}\text{-}^{15}\text{N}$  nOe at 850MHz. Calculated values are shown as green bars.

**Figure S13**

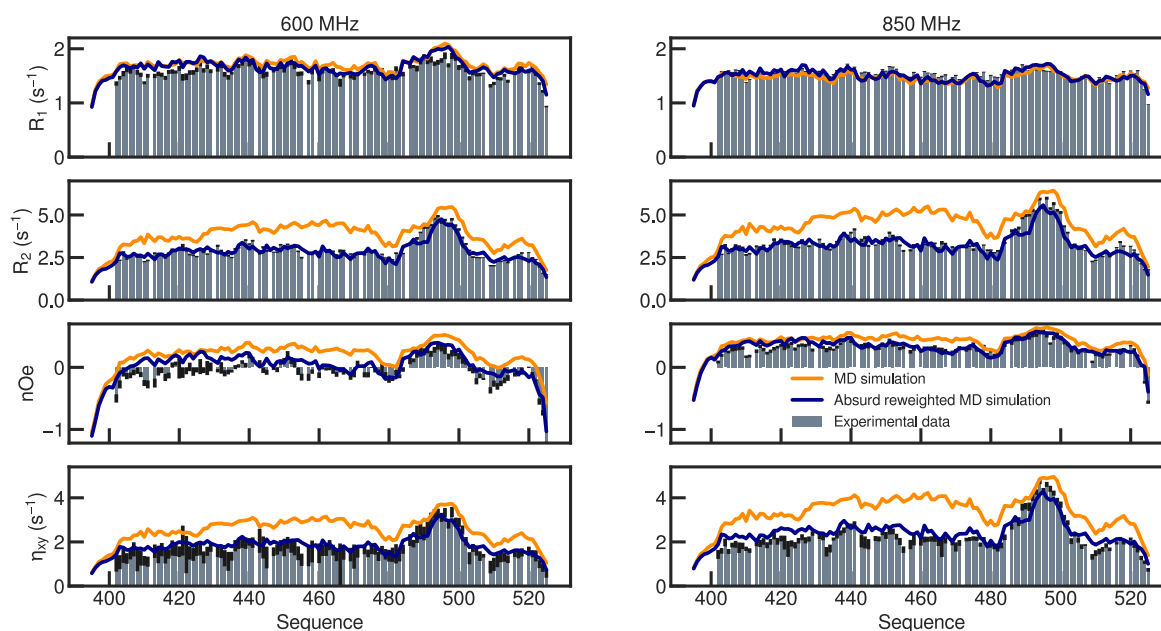

### **Reproduction of experimental relaxation rates using ABSURD ensemble trajectory analysis**

MD simulation of were performed with CHARMM36m (C36m) in combination with the TIP4P/2005 (t4p2005) water model. 30 trajectories of 200ns were calculated and analyzed. Predicted rates (orange) failed to accurately reproduce experimental rates (bars), especially those sensitive to  $J(0)$ . The ABSURD genetic algorithm targetting  $R_2$  at 850MHz selects the combination of trajectories that best reproduce this rate. Improvements in the agreement with all other experimental data is also observed (blue lines), indicating a better representation of the dynamic ensemble.

**Figure S14**

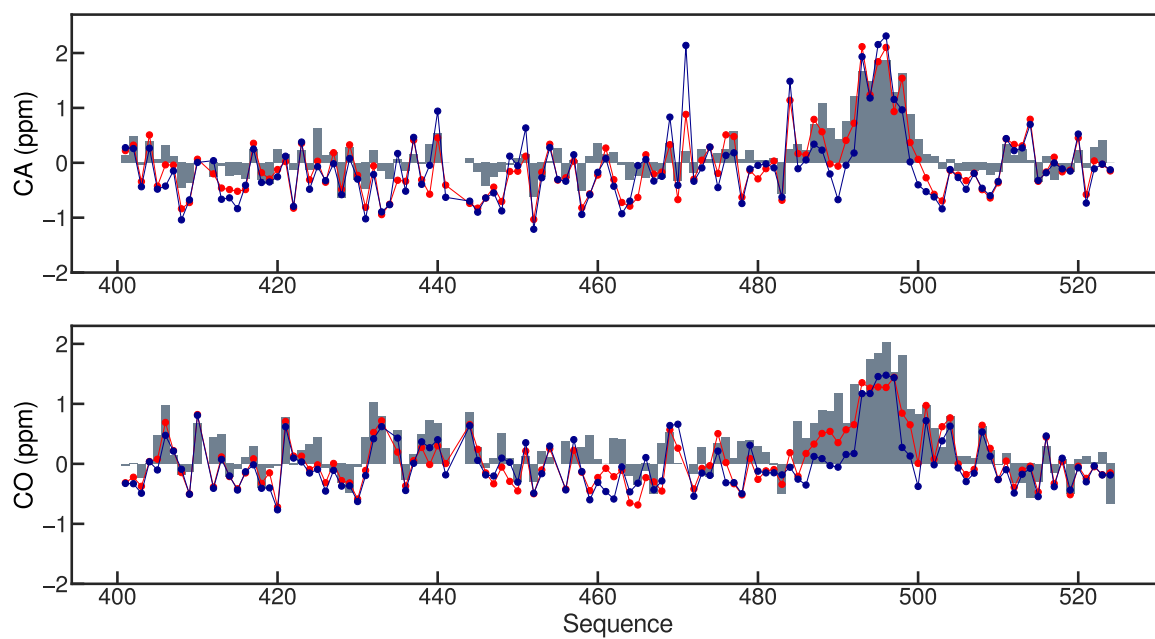

**Reproduction of experimental chemical shifts using ABSURD ensemble trajectory analysis and MD simulations of highly concentrated  $N_{TAIL}$**

Chemical shifts prediction derived from MD simulations of dilute (ABSURD ensemble of trajectories - blue), 20mM  $N_{TAIL}$  concentration (red) compared with experimental data from the dilute phase (grey bars).

**Figure S15**

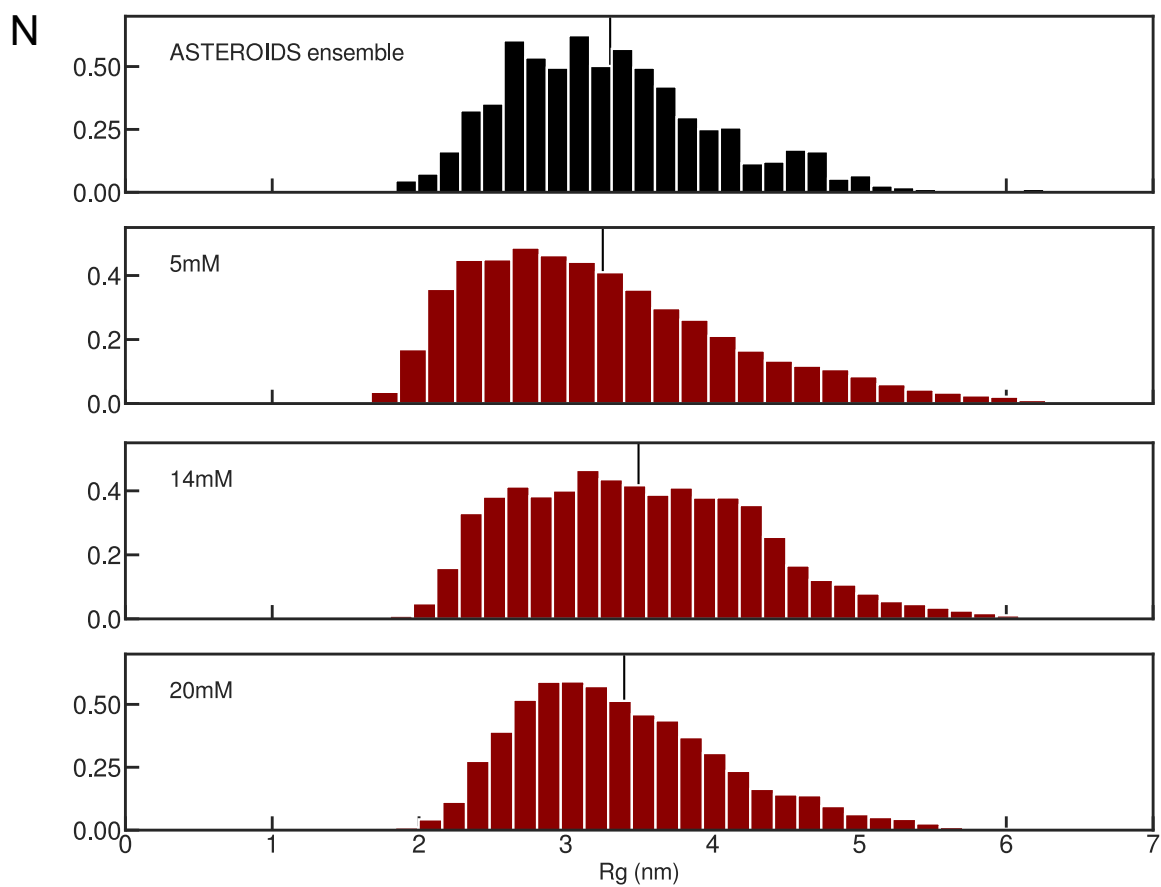

**Distribution of radii of gyration of the ASTEROIDS ensemble and MD simulations of highly concentrated  $N_{TAIL}$**

Radii of gyration were averaged over 100 conformers in the ASTEROIDS ensemble, and over 200ns and 125, 125 and 343 copies of the protein for the self-crowding simulations (5, 14 and 20mM respectively).



**Figure S16**

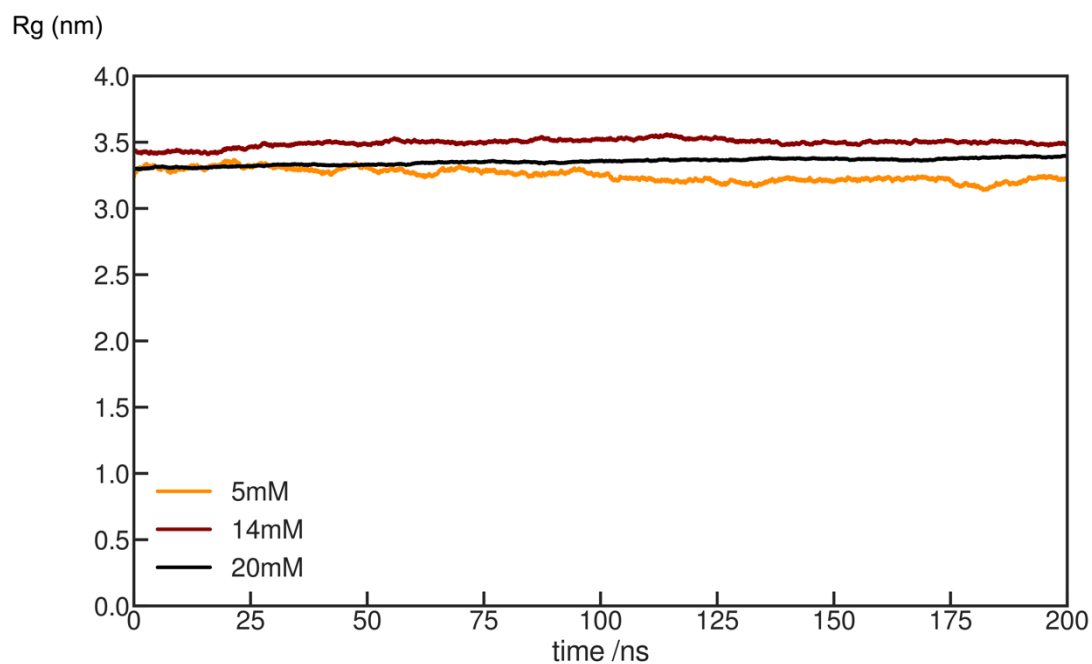

**Evolution of average radii of gyration of the MD simulations of highly concentrated  $N_{TAIL}$ .** Radii of gyration were averaged over 125, 125 and 343 copies of the protein for the self-crowding simulations (5, 14 and 20mM respectively).

**Figure S17**

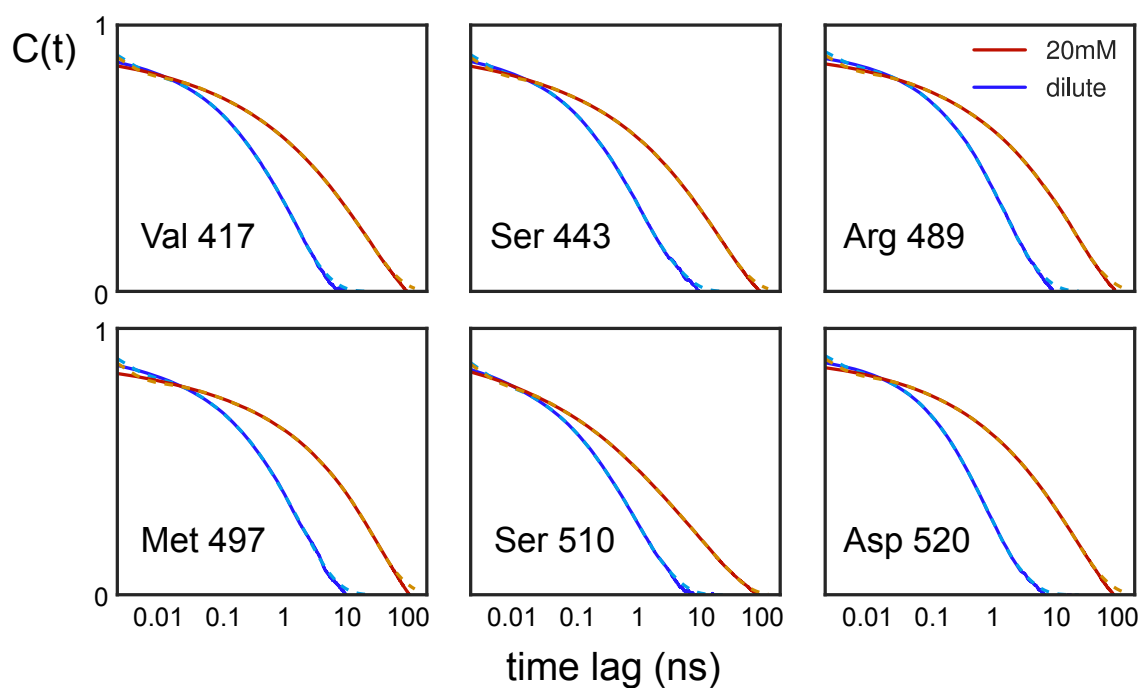

**Comparison of autocorrelation functions calculated from dilute and concentrated phase simulations**

Solid lines show correlation functions calculated from the ABSURD-derived ensemble of trajectories describing the dilute phase (blue) and the 20mM  $N_{TAIL}$  box (red), in this case the correlation function is averaged over 343 copies. Orange and light blue dashed lines show the fit to the correlation functions used to calculate the relaxation rates. Correlation functions (417, 443, 489, 497, 510 and 520) were randomly selected along the primary sequence.

**Figure S18**

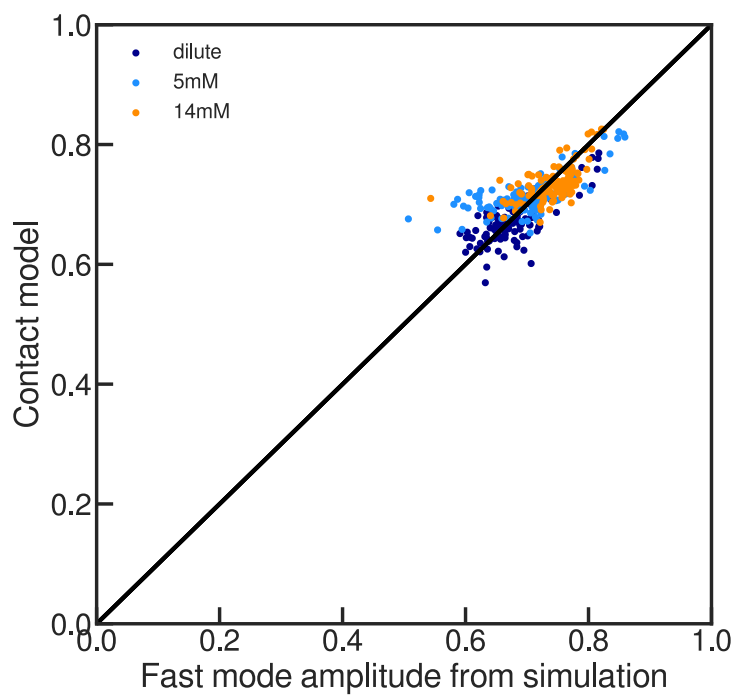

Correlation of amplitudes of motions calculated from the contact model (see methods) and derived from model free analysis of simulated relaxation rates.
